# Supplementary material for: Automated CT Analysis of Major Forms of Interstitial Lung Disease
Source: PubMed Central journal article supplement (PMC7700631; doi:10.3390/jcm9113776), 2020-11-23
Supplement: jcm-09-03776-s001.pdf [file jcm-09-03776-s001.pdf]

Supplementary

**Table 1.** ANOVA analysis of global volumes of specific CT findings across multidisciplinary diagnoses.

| CT feature           | ILD type | Average (mL) | ANOVA <i>p</i> -value |
|----------------------|----------|--------------|-----------------------|
| Reticulation         | IPF      | 165.6        | 0.464                 |
|                      | IPAF     | 169.2        |                       |
|                      | CTD      | 140.8        |                       |
|                      | HP       | 138.5        |                       |
| Low attenuation      | IPF      | 49.3         | 0.657                 |
|                      | IPAF     | 55.5         |                       |
|                      | CTD      | 64.5         |                       |
|                      | HP       | 26.7         |                       |
| Ground-glass opacity | IPF      | 784          | 0.247                 |
|                      | IPAF     | 846.5        |                       |
|                      | CTD      | 631.8        |                       |
|                      | HP       | 752.4        |                       |
| Honeycombing         | IPF      | 10.4         | 0.819                 |
|                      | IPAF     | 16.7         |                       |
|                      | CTD      | 8.2          |                       |
|                      | HP       | 12.8         |                       |

IPF = Idiopathic pulmonary fibrosis; IPAF = Interstitial pneumonia with autoimmune features; CTD = Connective tissue disease; HP = Hypersensitivity pneumonitis.

**Table 2. (a).** ANOVA analysis of left lung central volumes of specific CT findings across multidisciplinary diagnoses. **(b).** ANOVA analysis of right lung central volumes of specific CT findings across multidisciplinary diagnoses.

| (a)                  |          |              |                       |
|----------------------|----------|--------------|-----------------------|
| CT feature           | ILD type | Average (mL) | ANOVA <i>p</i> -value |
| Reticulation         | IPF      | 13.3         | 0.666                 |
|                      | IPAF     | 18           |                       |
|                      | CTD      | 13.6         |                       |
|                      | HP       | 16.2         |                       |
| Low attenuation      | IPF      | 10           | 0.22                  |
|                      | IPAF     | 19.6         |                       |
|                      | CTD      | 28.2         |                       |
|                      | HP       | 1.1          |                       |
| Ground-glass opacity | IPF      | 112.4        | 0.125                 |
|                      | IPAF     | 146.5        |                       |
|                      | CTD      | 90.6         |                       |
|                      | HP       | 130.7        |                       |
| Honeycombing         | IPF      | 1.94         | 0.675                 |
|                      | IPAF     | 3.28         |                       |
|                      | CTD      | 0.971        |                       |
|                      | HP       | 3.35         |                       |
| (b)                  |          |              |                       |
| CT feature           | ILD type | Average (mL) | ANOVA <i>p</i> -value |
| Reticulation         | IPF      | 20.5         | 0.891                 |
|                      | IPAF     | 22.5         |                       |
|                      | CTD      | 24.5         |                       |
|                      | HP       | 23.1         |                       |
| Low attenuation      | IPF      | 18.6         | 0.525                 |

|                      |      |       |       |
|----------------------|------|-------|-------|
|                      | IPAF | 14.6  |       |
|                      | CTD  | 15.1  |       |
|                      | HP   | 4.96  |       |
| Ground-glass opacity | IPF  | 124.3 | 0.548 |
|                      | IPAF | 155.8 |       |
|                      | CTD  | 128.1 |       |
|                      | HP   | 149.9 |       |
| Honeycombing         | IPF  | 2.71  | 0.729 |
|                      | IPAF | 4.46  |       |
|                      | CTD  | 1.84  |       |
|                      | HP   | 3.06  |       |

IPF = Idiopathic pulmonary fibrosis; IPAF = Interstitial pneumonia with autoimmune features; CTD = Connective tissue disease; HP = Hypersensitivity pneumonitis.

**Table 3. (a).** ANOVA analysis of left lung peripheral volumes of specific CT findings across multidisciplinary diagnoses. **(b).** ANOVA analysis of right lung peripheral volumes of specific CT findings across multidisciplinary diagnoses.

| (a)                  |          |              |                       |
|----------------------|----------|--------------|-----------------------|
| CT feature           | ILD type | Average (mL) | ANOVA <i>p</i> -value |
| Reticulation         | IPF      | 53.1         | 0.449                 |
|                      | IPAF     | 55.2         |                       |
|                      | CTD      | 45.1         |                       |
|                      | HP       | 43.8         |                       |
| Low attenuation      | IPF      | 10.6         | 0.915                 |
|                      | IPAF     | 9.27         |                       |
|                      | CTD      | 12.7         |                       |
|                      | HP       | 8.04         |                       |
| Ground-glass opacity | IPF      | 264.4        | <b>0.022</b>          |
|                      | IPAF     | 264.8        |                       |
|                      | CTD      | 180.8        |                       |
|                      | HP       | 221.4        |                       |
| Honeycombing         | IPF      | 2.88         | 0.932                 |
|                      | IPAF     | 3.87         |                       |
|                      | CTD      | 2.3          |                       |
|                      | HP       | 3.42         |                       |
| (b)                  |          |              |                       |
| CT feature           | ILD type | Average (mL) | ANOVA <i>p</i> -value |
| Reticulation         | IPF      | 78.7         | <b>0.026</b>          |
|                      | IPAF     | 73.5         |                       |
|                      | CTD      | 57.7         |                       |
|                      | HP       | 55.4         |                       |
| Low attenuation      | IPF      | 10.1         | 0.956                 |
|                      | IPAF     | 12.1         |                       |
|                      | CTD      | 8.53         |                       |
|                      | HP       | 12.6         |                       |
| Ground-glass opacity | IPF      | 282.8        | 0.33                  |
|                      | IPAF     | 279.4        |                       |
|                      | CTD      | 232.2        |                       |
|                      | HP       | 250.4        |                       |
| Honeycombing         | IPF      | 2.91         | 0.782                 |
|                      | IPAF     | 5.07         |                       |
|                      | CTD      | 3.04         |                       |
|                      | HP       | 3.01         |                       |

IPF = Idiopathic pulmonary fibrosis; IPAF = Interstitial pneumonia with autoimmune features; CTD = Connective tissue disease; HP = Hypersensitivity pneumonitis. The bolded values represent the significant results.

**Table 4.** (a). ANOVA analysis of left lung lower zone volumes of specific CT findings across multidisciplinary diagnoses. (b). ANOVA analysis of right lung lower zone volumes of specific CT findings across multidisciplinary diagnoses.

| (a)                  |          |              |                       |
|----------------------|----------|--------------|-----------------------|
| CT feature           | ILD type | Average (mL) | ANOVA <i>p</i> -value |
| Reticulation         | IPF      | 28.2         | 0.113                 |
|                      | IPAF     | 32.9         |                       |
|                      | CTD      | 28.5         |                       |
|                      | HP       | 19.8         |                       |
| Low attenuation      | IPF      | 3.09         | 0.786                 |
|                      | IPAF     | 4.7          |                       |
|                      | CTD      | 1.44         |                       |
|                      | HP       | 2.3          |                       |
| Ground-glass opacity | IPF      | 154.8        | 0.042                 |
|                      | IPAF     | 162.2        |                       |
|                      | CTD      | 125.2        |                       |
|                      | HP       | 119.8        |                       |
| Honeycombing         | IPF      | 1.45         | 0.787                 |
|                      | IPAF     | 3.05         |                       |
|                      | CTD      | 2.5          |                       |
|                      | HP       | 1.75         |                       |
| (b)                  |          |              |                       |
| CT feature           | ILD type | Average (mL) | ANOVA <i>p</i> -value |
| Reticulation         | IPF      | 39.5         | 0.055                 |
|                      | IPAF     | 41.2         |                       |
|                      | CTD      | 36.9         |                       |
|                      | HP       | 27.1         |                       |
| Low attenuation      | IPF      | 0.047        | 0.5                   |
|                      | IPAF     | 1.58         |                       |
|                      | CTD      | 0.145        |                       |
|                      | HP       | 2.49         |                       |
| Ground-glass opacity | IPF      | 159.6        | 0.312                 |
|                      | IPAF     | 154.8        |                       |
|                      | CTD      | 157.2        |                       |
|                      | HP       | 128.9        |                       |
| Honeycombing         | IPF      | 1.59         | 0.626                 |
|                      | IPAF     | 2.53         |                       |
|                      | CTD      | 2.21         |                       |
|                      | HP       | 1.19         |                       |

IPF = Idiopathic pulmonary fibrosis; IPAF = Interstitial pneumonia with autoimmune features; CTD = Connective tissue disease; HP = Hypersensitivity pneumonitis.

**Table 5.** (a). ANOVA analysis of left lung upper zone volumes of specific CT findings across multidisciplinary diagnoses. (b). ANOVA analysis of right lung upper zone volumes of specific CT findings across multidisciplinary diagnoses.

| (a)          |          |              |                       |
|--------------|----------|--------------|-----------------------|
| CT feature   | ILD type | Average (mL) | ANOVA <i>p</i> -value |
| Reticulation | IPF      | 15.8         | 0.462                 |
|              | IPAF     | 1.7          |                       |
|              | CTD      | 13.2         |                       |

|                      |      |       |       |
|----------------------|------|-------|-------|
| Low attenuation      | HP   | 19.7  | 0.168 |
|                      | IPF  | 15.3  |       |
|                      | IPAF | 11.7  |       |
|                      | CTD  | 28.8  |       |
| Ground-glass opacity | HP   | 3.17  | 0.111 |
|                      | IPF  | 74.1  |       |
|                      | IPAF | 88.5  |       |
|                      | CTD  | 50.2  |       |
| Honeycombing         | HP   | 94.5  | 0.618 |
|                      | IPF  | 1.98  |       |
|                      | IPAF | 2.11  |       |
|                      | CTD  | 0.238 |       |
|                      | HP   | 3.7   |       |

(b)

| CT feature           | ILD type | Average (mL) | ANOVA <i>p</i> -value |
|----------------------|----------|--------------|-----------------------|
| Reticulation         | IPF      | 23           | 0.776                 |
|                      | IPAF     | 23.1         |                       |
|                      | CTD      | 18.6         |                       |
|                      | HP       | 22.7         |                       |
| Low attenuation      | IPF      | 18           | 0.234                 |
|                      | IPAF     | 8.05         |                       |
|                      | CTD      | 9.86         |                       |
|                      | HP       | 3.36         |                       |
| Ground-glass opacity | IPF      | 92.1         | 0.177                 |
|                      | IPAF     | 105.5        |                       |
|                      | CTD      | 72.4         |                       |
|                      | HP       | 116.2        |                       |
| Honeycombing         | IPF      | 2.57         | 0.797                 |
|                      | IPAF     | 3.98         |                       |
|                      | CTD      | 1.06         |                       |
|                      | HP       | 3.15         |                       |

IPF = Idiopathic pulmonary fibrosis; IPAF = Interstitial pneumonia with autoimmune features; CTD = Connective tissue disease; HP = Hypersensitivity pneumonitis.

**Table 6.** Patient mortality data compared to normal tissue volume.

| Mortality status          | Average (mL) | <i>p</i> -value |
|---------------------------|--------------|-----------------|
| Alive ( <i>n</i> = 177)   | 1667.5       | 0.323           |
| Deceased ( <i>n</i> = 48) | 1560.7       |                 |
